# Supplementary material for: Improved taxonomic assignment of rumen bacterial 16S rRNA sequences using a revised SILVA taxonomic framework
Source: PeerJ. 2019 Mar 5;7:e6496. doi: 10.7717/peerj.6496 (PMC6407505; doi:10.7717/peerj.6496)
Supplement: Supplemental Information 2 — Prevalence of an OTU is in how many rumen samples it appears (n = 684). [file peerj-07-6496-s002.xlsx]

## Sheet: S2
Table S2. Extended data for Table 1.											Colour code	abundant OTU
Prevalence of an OTU is how many rumen samples it appears in (n = 684).												prevalent OTU
												abundant and prevalent OTU
#OTU ID	Count	% of sequences	Prevalence in samples (%)	RDP release 11.4	RDP training set 14	RDP training set 16	Greengenes 13_8	Silva 119	Silva 119Rum	Most detailed assignment	Lowest common denominator	Type Strain Match
4644	9089	0.19944	58.6257	Bacteria;Bacteroidetes;Bacteroidia;Bacteroidales;Prevotellaceae;Prevotella	Bacteria; Bacteroidetes; Bacteroidia; Bacteroidales; Prevotellaceae; Prevotella	Bacteria; Bacteroidetes; Bacteroidia; Bacteroidales; Prevotellaceae; Prevotella	k__Bacteria; p__Bacteroidetes; c__Bacteroidia; o__Bacteroidales; f__Prevotellaceae; g__Prevotella; s__	Bacteria; Bacteroidetes; Bacteroidia; Bacteroidales; Prevotellaceae; Prevotella	Bacteria; Bacteroidetes; Bacteroidia; Bacteroidales; Prevotellaceae; Prevotella 1	genus (all)	family (Prevotellaceae)	Prevotella ruminicola
4854	2238	0.0491085	63.0117	Bacteria;Firmicutes;Clostridia;Clostridiales;unclassified_Clostridiales;unclassified_Clostridiales	Bacteria; Firmicutes; Clostridia; Clostridiales; Eubacteriaceae; Alkalibaculum	Bacteria; Firmicutes; Clostridia; Clostridiales; Eubacteriaceae; Alkalibaculum	k__Bacteria; p__Firmicutes; c__Clostridia; o__Clostridiales; f__; g__; s__	Bacteria; Firmicutes; Clostridia; Clostridiales; Christensenellaceae; uncultured	Bacteria; Firmicutes; Clostridia; Clostridiales; Christensenellaceae; Christensenellaceae R-7 group	genus (RDP, Silva 123, Silva 123 extra)	order (Clostridiales)	[Clostridium] straminisolvens
9138	10527	0.230994	22.3684	Bacteria;Proteobacteria;Gammaproteobacteria;Aeromonadales;Succinivibrionaceae;Ruminobacter	Bacteria; Proteobacteria; Gammaproteobacteria; Aeromonadales; Succinivibrionaceae; Ruminobacter	Bacteria; Proteobacteria; Gammaproteobacteria; Aeromonadales; Succinivibrionaceae; Ruminobacter	k__Bacteria; p__Proteobacteria; c__Gammaproteobacteria; o__Aeromonadales; f__Succinivibrionaceae; g__Ruminobacter; s__	Bacteria; Proteobacteria; Gammaproteobacteria; Aeromonadales; Succinivibrionaceae; Ruminobacter	Bacteria; Proteobacteria; Gammaproteobacteria; Aeromonadales; Succinivibrionaceae; Ruminobacter	genus (all)	genus (Ruminobacter)	Ruminobacter amylophilus
10546	4805	0.105436	65.0585	Bacteria;unclassified_Bacteria;unclassified_Bacteria;unclassified_Bacteria;unclassified_Bacteria;unclassified_Bacteria	Bacteria; Firmicutes; Clostridia; Clostridiales; Clostridiaceae_2; Anoxynatronum	Bacteria; Firmicutes; Clostridia; Clostridiales; Peptococcaceae_2; Desulfotomaculum	k__Bacteria; p__Firmicutes; c__Clostridia; o__Clostridiales; f__Christensenellaceae; g__; s__	Bacteria; Firmicutes; Clostridia; Clostridiales; Christensenellaceae; uncultured	Bacteria; Firmicutes; Clostridia; Clostridiales; Christensenellaceae; Christensenellaceae R-7 group	genus (RDP, Silva 123, Silva 123 extra)	order (Clostridiales)	Christensenella minuta
15480	12071	0.264875	34.0643	Bacteria;Proteobacteria;Gammaproteobacteria;unclassified_Gammaproteobacteria;unclassified_Gammaproteobacteria;unclassified_Gammaproteobacteria	Bacteria; Proteobacteria; Gammaproteobacteria; Aeromonadales; Succinivibrionaceae; Succinivibrio	Bacteria; Proteobacteria; Gammaproteobacteria; Aeromonadales; Succinivibrionaceae; Succinivibrio	k__Bacteria; p__Proteobacteria; c__Gammaproteobacteria; o__Aeromonadales; f__Succinivibrionaceae; g__; s__	Bacteria; Proteobacteria; Gammaproteobacteria; Aeromonadales; Succinivibrionaceae; uncultured	Bacteria; Proteobacteria; Gammaproteobacteria; Aeromonadales; Succinivibrionaceae; Succinivibrionaceae UCG-002	genus (RDP, Silva 123, Silva 123 extra)	family (Succinivibrionaceae)	Succinivibrio dextrinosolvens
25104	7751	0.170081	43.8596	Bacteria;Fibrobacteres;Fibrobacteria;Fibrobacterales;Fibrobacteraceae;Fibrobacter	Bacteria; Fibrobacteres; Fibrobacteria; Fibrobacterales; Fibrobacteraceae; Fibrobacter	Bacteria; Fibrobacteres; Fibrobacteria; Fibrobacterales; Fibrobacteraceae; Fibrobacter	k__Bacteria; p__Fibrobacteres; c__Fibrobacteria; o__Fibrobacterales; f__Fibrobacteraceae; g__Fibrobacter; s__succinogenes	Bacteria; Fibrobacteres; Fibrobacteria; Fibrobacterales; Fibrobacteraceae; Fibrobacter	Bacteria; Fibrobacteres; Fibrobacteria; Fibrobacterales; Fibrobacteraceae; Fibrobacter	genus (all)	genus (Fibrobacter)	Fibrobacter succinogenes
46566	6475	0.142081	55.4094	Bacteria;Bacteroidetes;Bacteroidia;Bacteroidales;Prevotellaceae;Prevotella	Bacteria; Bacteroidetes; Bacteroidia; Bacteroidales; Prevotellaceae; Prevotella	Bacteria; Bacteroidetes; Bacteroidia; Bacteroidales; Prevotellaceae; Prevotella	k__Bacteria; p__Bacteroidetes; c__Bacteroidia; o__Bacteroidales; f__Prevotellaceae; g__Prevotella; s__	Bacteria; Bacteroidetes; Bacteroidia; Bacteroidales; Prevotellaceae; Prevotella	Bacteria; Bacteroidetes; Bacteroidia; Bacteroidales; Prevotellaceae; Prevotella 1	genus (all)	family (Prevotellaceae)	Prevotella ruminicola
60316	2968	0.065127	62.7193	Bacteria;Firmicutes;Clostridia;Clostridiales;Clostridiales_Incertae Sedis XIII;Mogibacterium	Bacteria; Firmicutes; Clostridia; Clostridiales; Clostridiales_Incertae_Sedis_XIII; Mogibacterium	Bacteria; Firmicutes; Clostridia; Clostridiales; Clostridiales_Incertae_Sedis_XIII; Mogibacterium	k__Bacteria; p__Firmicutes; c__Clostridia; o__Clostridiales; f__[Mogibacteriaceae]; g__Mogibacterium; s__	Bacteria; Firmicutes; Clostridia; Clostridiales; Family XIII; Mogibacterium	Bacteria; Firmicutes; Clostridia; Clostridiales; Family XIII; Mogibacterium	genus (all)	genus (Mogibacterium)	Mogibacterium neglectum
60575	6338	0.139075	6.43275	Bacteria;Firmicutes;Bacilli;Lactobacillales;Lactobacillaceae;Lactobacillus	Bacteria; Firmicutes; Bacilli; Lactobacillales; Lactobacillaceae; Lactobacillus	Bacteria; Firmicutes; Bacilli; Lactobacillales; Lactobacillaceae; Lactobacillus	k__Bacteria; p__Firmicutes; c__Bacilli; o__Lactobacillales; f__Lactobacillaceae; g__Lactobacillus; s__mucosae	Bacteria; Firmicutes; Bacilli; Lactobacillales; Lactobacillaceae; Lactobacillus	Bacteria; Firmicutes; Bacilli; Lactobacillales; Lactobacillaceae; Lactobacillus	genus (all)	genus (Lactobacillus)	Lactobacillus mucosae
60839	3735	0.0819573	64.9123	Bacteria;SR1;unclassified_SR1;unclassified_SR1;unclassified_SR1;SR1_genera_incertae_sedis	Bacteria; SR1	Bacteria; SR1	k__Bacteria; p__SR1; c__; o__; f__; g__; s__	Bacteria; Candidate division SR1	Bacteria; Candidate division SR1	phylum (all)	phylum (SR1)	Acetitomaculum ruminis
84178	2934	0.0643809	58.0409	Bacteria;Firmicutes;Clostridia;Clostridiales;Ruminococcaceae;Saccharofermentans	Bacteria; Firmicutes; Clostridia; Clostridiales; Ruminococcaceae; Saccharofermentans	Bacteria; Firmicutes; Clostridia; Clostridiales; Ruminococcaceae; Saccharofermentans	k__Bacteria; p__Firmicutes; c__Clostridia; o__Clostridiales; f__Clostridiaceae; g__Clostridium; s__	Bacteria; Firmicutes; Clostridia; Clostridiales; Ruminococcaceae; Saccharofermentans	Bacteria; Firmicutes; Clostridia; Clostridiales; Ruminococcaceae; Saccharofermentans	genus (all)	order (Clostridiales)	Saccharofermentans acetigenes
90393	22952	0.503637	82.8947	Bacteria;Firmicutes;Clostridia;Clostridiales;unclassified_Clostridiales;unclassified_Clostridiales	Bacteria; Firmicutes; Clostridia; Clostridiales; Eubacteriaceae; Alkalibaculum	Bacteria; Firmicutes; Clostridia; Clostridiales; Eubacteriaceae; Alkalibaculum	k__Bacteria; p__Firmicutes; c__Clostridia; o__Clostridiales; f__; g__; s__	Bacteria; Firmicutes; Clostridia; Clostridiales; Christensenellaceae; uncultured	Bacteria; Firmicutes; Clostridia; Clostridiales; Christensenellaceae; Christensenellaceae R-7 group	genus (RDP, Silva 123, Silva 123 extra)	order (Clostridiales)	[Clostridium] straminisolvens
97093	5747	0.126107	36.1111	Bacteria;Fibrobacteres;Fibrobacteria;Fibrobacterales;Fibrobacteraceae;Fibrobacter	Bacteria; Fibrobacteres; Fibrobacteria; Fibrobacterales; Fibrobacteraceae; Fibrobacter	Bacteria; Fibrobacteres; Fibrobacteria; Fibrobacterales; Fibrobacteraceae; Fibrobacter	k__Bacteria; p__Fibrobacteres; c__Fibrobacteria; o__Fibrobacterales; f__Fibrobacteraceae; g__Fibrobacter; s__succinogenes	Bacteria; Fibrobacteres; Fibrobacteria; Fibrobacterales; Fibrobacteraceae; Fibrobacter	Bacteria; Fibrobacteres; Fibrobacteria; Fibrobacterales; Fibrobacteraceae; Fibrobacter	genus (all)	genus (Fibrobacter)	Fibrobacter succinogenes
98494	6669	0.146338	59.7953	Bacteria;unclassified_Bacteria;unclassified_Bacteria;unclassified_Bacteria;unclassified_Bacteria;unclassified_Bacteria	Bacteria; Firmicutes; Clostridia; Clostridiales; Ruminococcaceae; Saccharofermentans	Bacteria; Firmicutes; Clostridia; Clostridiales; Christensenellaceae; Christensenella	k__Bacteria; p__Firmicutes; c__Clostridia; o__Clostridiales; f__Christensenellaceae; g__; s__	Bacteria; Firmicutes; Clostridia; Clostridiales; Christensenellaceae; uncultured	Bacteria; Firmicutes; Clostridia; Clostridiales; Christensenellaceae; Christensenellaceae R-7 group	genus (RDP, Silva 123, Silva 123 extra)	order (Clostridiales)	Christensenella minuta
109054	2227	0.0488672	59.6491	Bacteria;Firmicutes;Clostridia;Clostridiales;Lachnospiraceae;unclassified_Lachnospiraceae	Bacteria; Firmicutes; Clostridia; Clostridiales; Lachnospiraceae; Clostridium_XlVa	Bacteria; Firmicutes; Clostridia; Clostridiales; Lachnospiraceae; Clostridium_XlVa	k__Bacteria; p__Firmicutes; c__Clostridia; o__Clostridiales; f__Lachnospiraceae; g__Moryella; s__	Bacteria; Firmicutes; Clostridia; Clostridiales; Lachnospiraceae; Moryella	Bacteria; Firmicutes; Clostridia; Clostridiales; Lachnospiraceae; Moryella	genus (all)	family (Lachnospiraceae)	Stomatobaculum longum
113096	2609	0.0572494	58.6257	Bacteria;Firmicutes;Clostridia;Clostridiales;unclassified_Clostridiales;unclassified_Clostridiales	Bacteria; Firmicutes; Clostridia; Clostridiales; Eubacteriaceae; Alkalibaculum	Bacteria; Firmicutes; Clostridia; Clostridiales; Eubacteriaceae; Alkalibaculum	k__Bacteria; p__Firmicutes; c__Clostridia; o__Clostridiales; f__; g__; s__	Bacteria; Firmicutes; Clostridia; Clostridiales; Christensenellaceae; uncultured	Bacteria; Firmicutes; Clostridia; Clostridiales; Christensenellaceae; Christensenellaceae R-7 group	genus (RDP, Silva 123, Silva 123 extra)	order (Clostridiales)	[Clostridium] straminisolvens
137925	2209	0.0484722	57.6023	Bacteria;Firmicutes;Clostridia;Clostridiales;unclassified_Clostridiales;unclassified_Clostridiales	Bacteria; Firmicutes; Clostridia; Clostridiales; Eubacteriaceae; Alkalibaculum	Bacteria; Firmicutes; Clostridia; Clostridiales; Eubacteriaceae; Alkalibaculum	k__Bacteria; p__Firmicutes; c__Clostridia; o__Clostridiales; f__; g__; s__	Bacteria; Firmicutes; Clostridia; Clostridiales; Christensenellaceae; uncultured	Bacteria; Firmicutes; Clostridia; Clostridiales; Christensenellaceae; Christensenellaceae R-7 group	genus (RDP, Silva 123, Silva 123 extra)	order (Clostridiales)	[Clostridium] cellobioparum
139212	8214	0.18024	80.5556	Bacteria;Firmicutes;Clostridia;Clostridiales;Ruminococcaceae;unclassified_Ruminococcaceae	Bacteria; Firmicutes; Clostridia; Clostridiales; Ruminococcaceae; Clostridium_III	Bacteria; Firmicutes; Clostridia; Clostridiales; Ruminococcaceae; Acetivibrio	k__Bacteria; p__Firmicutes; c__Clostridia; o__Clostridiales; f__Ruminococcaceae; g__; s__	Bacteria; Firmicutes; Clostridia; Clostridiales; Ruminococcaceae; Saccharofermentans	Bacteria; Firmicutes; Clostridia; Clostridiales; Ruminococcaceae; Saccharofermentans	genus (RDP, Silva 119, Silva 123, Silva 123 extra)	family (Ruminococcaceae)	Saccharofermentans acetigenes
142948	25360	0.556476	51.462	Bacteria;Bacteroidetes;Bacteroidia;Bacteroidales;Prevotellaceae;unclassified_"Prevotellaceae"	Bacteria; Bacteroidetes; Bacteroidia; Bacteroidales; Prevotellaceae; Prevotella	Bacteria; Bacteroidetes; Bacteroidia; Bacteroidales; Prevotellaceae; Prevotella	k__Bacteria; p__Bacteroidetes; c__Bacteroidia; o__Bacteroidales; f__Prevotellaceae; g__Prevotella; s__	Bacteria; Bacteroidetes; Bacteroidia; Bacteroidales; Prevotellaceae; Prevotella	Bacteria; Bacteroidetes; Bacteroidia; Bacteroidales; Prevotellaceae; Prevotella 1	genus (Silva 123, Silva 123 extra)	family (Prevotellaceae)	Prevotella ruminicola
158624	9111	0.199923	56.1404	Bacteria;Bacteroidetes;Bacteroidia;Bacteroidales;Prevotellaceae;Prevotella	Bacteria; Bacteroidetes; Bacteroidia; Bacteroidales; Prevotellaceae; Prevotella	Bacteria; Bacteroidetes; Bacteroidia; Bacteroidales; Prevotellaceae; Prevotella	k__Bacteria; p__Bacteroidetes; c__Bacteroidia; o__Bacteroidales; f__Prevotellaceae; g__Prevotella; s__	Bacteria; Bacteroidetes; Bacteroidia; Bacteroidales; Prevotellaceae; Prevotella	Bacteria; Bacteroidetes; Bacteroidia; Bacteroidales; Prevotellaceae; Prevotella 1	genus (all)	family (Prevotellaceae)	Prevotella ruminicola
164551	1917	0.0420648	57.6023	Bacteria;Firmicutes;Clostridia;Clostridiales;Lachnospiraceae;Butyrivibrio	Bacteria; Firmicutes; Clostridia; Clostridiales; Lachnospiraceae; Clostridium_XlVa	Bacteria; Firmicutes; Clostridia; Clostridiales; Lachnospiraceae; Butyrivibrio	k__Bacteria; p__Firmicutes; c__Clostridia; o__Clostridiales; f__Lachnospiraceae; g__Butyrivibrio; s__	Bacteria; Firmicutes; Clostridia; Clostridiales; Lachnospiraceae; Butyrivibrio	Bacteria; Firmicutes; Clostridia; Clostridiales; Lachnospiraceae; Butyrivibrio 2	genus (all)	family (Lachnospiraceae)	Butyrivibrio proteoclasticus
177612	6144	0.134818	56.2865	Bacteria;Bacteroidetes;Bacteroidia;Bacteroidales;Prevotellaceae;Prevotella	Bacteria; Bacteroidetes; Bacteroidia; Bacteroidales; Prevotellaceae; Prevotella	Bacteria; Bacteroidetes; Bacteroidia; Bacteroidales; Prevotellaceae; Prevotella	k__Bacteria; p__Bacteroidetes; c__Bacteroidia; o__Bacteroidales; f__Prevotellaceae; g__Prevotella; s__	Bacteria; Bacteroidetes; Bacteroidia; Bacteroidales; Prevotellaceae; Prevotella	Bacteria; Bacteroidetes; Bacteroidia; Bacteroidales; Prevotellaceae; Prevotella 1	genus (all)	family (Prevotellaceae)	Prevotella ruminicola
178763	10125	0.222173	43.5673	Bacteria;Firmicutes;Bacilli;Lactobacillales;Streptococcaceae;Streptococcus	Bacteria; Firmicutes; Bacilli; Lactobacillales; Streptococcaceae; Streptococcus	Bacteria; Firmicutes; Bacilli; Lactobacillales; Streptococcaceae; Streptococcus	k__Bacteria; p__Firmicutes; c__Bacilli; o__Lactobacillales; f__Streptococcaceae; g__Streptococcus; s__	Bacteria; Firmicutes; Bacilli; Lactobacillales; Streptococcaceae; Streptococcus	Bacteria; Firmicutes; Bacilli; Lactobacillales; Streptococcaceae; Streptococcus	genus (all)	genus (Streptococcus)	Streptococcus lutetiensis
205298	3498	0.0767568	65.3509	Bacteria;Firmicutes;Clostridia;Clostridiales;Lachnospiraceae;unclassified_Lachnospiraceae	Bacteria; Firmicutes; Clostridia; Clostridiales; Lachnospiraceae; Coprococcus	Bacteria; Firmicutes; Clostridia; Clostridiales; Lachnospiraceae; Coprococcus	k__Bacteria; p__Firmicutes; c__Clostridia; o__Clostridiales; f__; g__; s__	Bacteria; Firmicutes; Clostridia; Clostridiales; Lachnospiraceae; uncultured	Bacteria; Firmicutes; Clostridia; Clostridiales; Lachnospiraceae; Lachnospiraceae FCS020 group	genus (RDP, Silva 123, Silva 123 extra)	order (Clostridiales)	Coprococcus eutactus
206943	6600	0.144824	72.9532	Bacteria;Firmicutes;Clostridia;Clostridiales;unclassified_Clostridiales;unclassified_Clostridiales	Bacteria; Firmicutes; Clostridia; Clostridiales; Eubacteriaceae; Alkalibaculum	Bacteria; Firmicutes; Clostridia; Clostridiales; Eubacteriaceae; Alkalibaculum	k__Bacteria; p__Firmicutes; c__Clostridia; o__Clostridiales; f__; g__; s__	Bacteria; Firmicutes; Clostridia; Clostridiales; Christensenellaceae; uncultured	Bacteria; Firmicutes; Clostridia; Clostridiales; Christensenellaceae; Christensenellaceae R-7 group	genus (RDP, Silva 123, Silva 123 extra)	order (Clostridiales)	[Clostridium] straminisolvens
232168	2081	0.0456635	61.5497	Bacteria;Firmicutes;Clostridia;Clostridiales;unclassified_Clostridiales;unclassified_Clostridiales	Bacteria; Firmicutes; Clostridia; Clostridiales; Eubacteriaceae; Alkalibaculum	Bacteria; Firmicutes; Clostridia; Clostridiales; Eubacteriaceae; Alkalibaculum	k__Bacteria; p__Firmicutes; c__Clostridia; o__Clostridiales; f__; g__; s__	Bacteria; Firmicutes; Clostridia; Clostridiales; Christensenellaceae; uncultured	Bacteria; Firmicutes; Clostridia; Clostridiales; Christensenellaceae; Christensenellaceae R-7 group	genus (RDP, Silva 123, Silva 123 extra)	order (Clostridiales)	[Clostridium] straminisolvens
234051	3037	0.066641	64.3275	Bacteria;Firmicutes;Clostridia;Clostridiales;Lachnospiraceae;Lachnospiracea_incertae_sedis	Bacteria; Firmicutes; Clostridia; Clostridiales; Lachnospiraceae	Bacteria; Firmicutes; Clostridia; Clostridiales; Lachnospiraceae	k__Bacteria; p__Firmicutes; c__Clostridia; o__Clostridiales; f__Lachnospiraceae; g__Coprococcus; s__	Bacteria; Firmicutes; Clostridia; Clostridiales; Lachnospiraceae; Incertae Sedis	Bacteria; Firmicutes; Clostridia; Clostridiales; Lachnospiraceae; [Eubacterium] ruminantium group	genus (Greengenes, Silva 123, Silva 123 extra)	family (Lachnospiraceae)	[Eubacterium] ruminantium
237285	18564	0.407351	86.9883	Bacteria;Firmicutes;Clostridia;Clostridiales;Lachnospiraceae;Pseudobutyrivibrio	Bacteria; Firmicutes; Clostridia; Clostridiales; Lachnospiraceae; Pseudobutyrivibrio	Bacteria; Firmicutes; Clostridia; Clostridiales; Lachnospiraceae; Pseudobutyrivibrio	k__Bacteria; p__Firmicutes; c__Clostridia; o__Clostridiales; f__Lachnospiraceae; g__Pseudobutyrivibrio; s__	Bacteria; Firmicutes; Clostridia; Clostridiales; Lachnospiraceae; Pseudobutyrivibrio	Bacteria; Firmicutes; Clostridia; Clostridiales; Lachnospiraceae; Pseudobutyrivibrio	genus (all)	genus (Pseudobutyrivibrio)	Pseudobutyrivibrio ruminis
237588	3194	0.0700861	57.8947	Bacteria;Firmicutes;Clostridia;Clostridiales;unclassified_Clostridiales;unclassified_Clostridiales	Bacteria; Firmicutes; Clostridia; Clostridiales; Ruminococcaceae; Anaerofilum	Bacteria; Firmicutes; Clostridia; Clostridiales; Ruminococcaceae; Anaerofilum	k__Bacteria; p__Firmicutes; c__Clostridia; o__Clostridiales; f__Ruminococcaceae; g__; s__	Bacteria; Firmicutes; Clostridia; Clostridiales; Ruminococcaceae; Ruminococcus	Bacteria; Firmicutes; Clostridia; Clostridiales; Ruminococcaceae; Ruminococcus 1	genus (RDP, Silva 119, Silva 123, Silva 123 extra)	family (Ruminococcaceae)	Ruminococcus flavefaciens
245302	10604	0.232684	70.0292	Bacteria;Fibrobacteres;Fibrobacteria;Fibrobacterales;Fibrobacteraceae;Fibrobacter	Bacteria; Fibrobacteres; Fibrobacteria; Fibrobacterales; Fibrobacteraceae; Fibrobacter	Bacteria; Fibrobacteres; Fibrobacteria; Fibrobacterales; Fibrobacteraceae; Fibrobacter	k__Bacteria; p__Fibrobacteres; c__Fibrobacteria; o__Fibrobacterales; f__Fibrobacteraceae; g__Fibrobacter; s__succinogenes	Bacteria; Fibrobacteres; Fibrobacteria; Fibrobacterales; Fibrobacteraceae; Fibrobacter	Bacteria; Fibrobacteres; Fibrobacteria; Fibrobacterales; Fibrobacteraceae; Fibrobacter	genus (all)	genus (Fibrobacter)	Fibrobacter succinogenes
248019	19405	0.425805	75.4386	Bacteria;Firmicutes;Clostridia;Clostridiales;unclassified_Clostridiales;unclassified_Clostridiales	Bacteria; Firmicutes; Clostridia; Clostridiales; Ruminococcaceae; Clostridium_III	Bacteria; Firmicutes; Clostridia; Clostridiales; Ruminococcaceae; Clostridium_III	k__Bacteria; p__Firmicutes; c__Clostridia; o__Clostridiales; f__; g__; s__	Bacteria; Firmicutes; Clostridia; Clostridiales; Christensenellaceae; uncultured	Bacteria; Firmicutes; Clostridia; Clostridiales; Christensenellaceae; Christensenellaceae R-7 group	genus (RDP, Silva 123, Silva 123 extra)	order (Clostridiales)	[Clostridium] straminisolvens
250686	3036	0.0666191	61.2573	Bacteria;Firmicutes;Clostridia;Clostridiales;unclassified_Clostridiales;unclassified_Clostridiales	Bacteria; Firmicutes; Clostridia; Clostridiales; Ruminococcaceae; Clostridium_III	Bacteria; Firmicutes; Clostridia; Clostridiales; Christensenellaceae; Christensenella	k__Bacteria; p__Firmicutes; c__Clostridia; o__Clostridiales; f__; g__; s__	Bacteria; Firmicutes; Clostridia; Clostridiales; Christensenellaceae; uncultured	Bacteria; Firmicutes; Clostridia; Clostridiales; Christensenellaceae; Christensenellaceae R-7 group	genus (RDP, Silva 123)	order (Clostridiales)	[Clostridium] straminisolvens
268113	4920	0.10796	64.7661	Bacteria;Firmicutes;Negativicutes;Selenomonadales;Acidaminococcaceae;Succiniclasticum	Bacteria; Firmicutes; Negativicutes; Selenomonadales; Acidaminococcaceae; Succiniclasticum	Bacteria; Firmicutes; Negativicutes; Selenomonadales; Acidaminococcaceae; Succiniclasticum	k__Bacteria; p__Firmicutes; c__Clostridia; o__Clostridiales; f__Veillonellaceae; g__Succiniclasticum; s__	Bacteria; Firmicutes; Negativicutes; Selenomonadales; Acidaminococcaceae; Succiniclasticum	Bacteria; Firmicutes; Negativicutes; Selenomonadales; Acidaminococcaceae; Succiniclasticum	genus (all)	phylum (Firmicutes)	Succiniclasticum ruminins
272296	7198	0.157946	18.2749	Bacteria;Bacteroidetes;Bacteroidia;Bacteroidales;Prevotellaceae;Prevotella	Bacteria; Bacteroidetes; Bacteroidia; Bacteroidales; Prevotellaceae; Prevotella	Bacteria; Bacteroidetes; Bacteroidia; Bacteroidales; Prevotellaceae; Prevotella	k__Bacteria; p__Bacteroidetes; c__Bacteroidia; o__Bacteroidales; f__Prevotellaceae; g__Prevotella; s__	Bacteria; Bacteroidetes; Bacteroidia; Bacteroidales; Prevotellaceae; Prevotella	Bacteria; Bacteroidetes; Bacteroidia; Bacteroidales; Prevotellaceae; Prevotella 1	genus (all)	family (Prevotellaceae)	Prevotella brevis
282075	10039	0.220286	42.2515	Bacteria;Bacteroidetes;Bacteroidia;Bacteroidales;Prevotellaceae;unclassified_"Prevotellaceae"	Bacteria; Bacteroidetes; Bacteroidia; Bacteroidales; Prevotellaceae; Prevotella	Bacteria; Bacteroidetes; Bacteroidia; Bacteroidales; Prevotellaceae; Prevotella	k__Bacteria; p__Bacteroidetes; c__Bacteroidia; o__Bacteroidales; f__Prevotellaceae; g__Prevotella; s__	Bacteria; Bacteroidetes; Bacteroidia; Bacteroidales; Prevotellaceae; Prevotella	Bacteria; Bacteroidetes; Bacteroidia; Bacteroidales; Prevotellaceae; Prevotella 1	genus (all)	family (Prevotellaceae)	Prevotella loescheii
284365	12279	0.269439	75.5848	Bacteria;Firmicutes;Negativicutes;Selenomonadales;Acidaminococcaceae;Succiniclasticum	Bacteria; Firmicutes; Negativicutes; Selenomonadales; Acidaminococcaceae; Succiniclasticum	Bacteria; Firmicutes; Negativicutes; Selenomonadales; Acidaminococcaceae; Succiniclasticum	k__Bacteria; p__Firmicutes; c__Clostridia; o__Clostridiales; f__Veillonellaceae; g__Succiniclasticum; s__	Bacteria; Firmicutes; Negativicutes; Selenomonadales; Acidaminococcaceae; Succiniclasticum	Bacteria; Firmicutes; Negativicutes; Selenomonadales; Acidaminococcaceae; Succiniclasticum	genus (all)	phylum (Firmicutes)	Succiniclasticum ruminins
287012	11244	0.246728	54.5322	Bacteria;Firmicutes;Clostridia;Clostridiales;Lachnospiraceae;unclassified_Lachnospiraceae	Bacteria; Firmicutes; Clostridia; Clostridiales; Lachnospiraceae; Butyrivibrio	Bacteria; Firmicutes; Clostridia; Clostridiales; Lachnospiraceae; Butyrivibrio	k__Bacteria; p__Firmicutes; c__Clostridia; o__Clostridiales; f__Lachnospiraceae; g__Butyrivibrio; s__	Bacteria; Firmicutes; Clostridia; Clostridiales; Lachnospiraceae; Butyrivibrio	Bacteria; Firmicutes; Clostridia; Clostridiales; Lachnospiraceae; Lachnospiraceae NK3A20 group	genus (all)	family (Lachnospiraceae)	[Clostridium] clostridioforme
295461	6761	0.148357	50.1462	Bacteria;Firmicutes;Clostridia;Clostridiales;Ruminococcaceae;unclassified_Ruminococcaceae	Bacteria; Firmicutes; Clostridia; Clostridiales; Ruminococcaceae; Anaerotruncus	Bacteria; Firmicutes; Clostridia; Clostridiales; Ruminococcaceae; Anaerotruncus	k__Bacteria; p__Firmicutes; c__Clostridia; o__Clostridiales; f__Ruminococcaceae; g__; s__	Bacteria; Firmicutes; Clostridia; Clostridiales; Ruminococcaceae; uncultured	Bacteria; Firmicutes; Clostridia; Clostridiales; Ruminococcaceae; [Eubacterium] coprostanoligenes group	genus (RDP, Silva 123, Silva 123 extra)	family (Ruminococcaceae)	Anaerotruncus colihominis
301049	6924	0.151934	64.0351	Bacteria;Fibrobacteres;Fibrobacteria;Fibrobacterales;Fibrobacteraceae;Fibrobacter	Bacteria; Fibrobacteres; Fibrobacteria; Fibrobacterales; Fibrobacteraceae; Fibrobacter	Bacteria; Fibrobacteres; Fibrobacteria; Fibrobacterales; Fibrobacteraceae; Fibrobacter	k__Bacteria; p__Fibrobacteres; c__Fibrobacteria; o__Fibrobacterales; f__Fibrobacteraceae; g__Fibrobacter; s__succinogenes	Bacteria; Fibrobacteres; Fibrobacteria; Fibrobacterales; Fibrobacteraceae; Fibrobacter	Bacteria; Fibrobacteres; Fibrobacteria; Fibrobacterales; Fibrobacteraceae; Fibrobacter	genus (all)	genus (Fibrobacter)	Fibrobacter succinogenes
301314	2339	0.0513248	58.9181	Bacteria;Firmicutes;Clostridia;Clostridiales;Lachnospiraceae;Butyrivibrio	Bacteria; Firmicutes; Clostridia; Clostridiales; Lachnospiraceae; Butyrivibrio	Bacteria; Firmicutes; Clostridia; Clostridiales; Lachnospiraceae; Butyrivibrio	k__Bacteria; p__Firmicutes; c__Clostridia; o__Clostridiales; f__Lachnospiraceae; g__Butyrivibrio; s__	Bacteria; Firmicutes; Clostridia; Clostridiales; Lachnospiraceae; Butyrivibrio	Bacteria; Firmicutes; Clostridia; Clostridiales; Lachnospiraceae; Butyrivibrio 2	genus (all)	family (Lachnospiraceae)	Butyrivibrio hungatei
311462	2739	0.060102	60.0877	Bacteria;Firmicutes;Clostridia;Clostridiales;Lachnospiraceae;unclassified_Lachnospiraceae	Bacteria; Firmicutes; Clostridia; Clostridiales; Lachnospiraceae; Clostridium_XlVa	Bacteria; Firmicutes; Clostridia; Clostridiales; Lachnospiraceae; Clostridium_XlVa	k__Bacteria; p__Firmicutes; c__Clostridia; o__Clostridiales; f__; g__; s__	Bacteria; Firmicutes; Clostridia; Clostridiales; Lachnospiraceae; Incertae Sedis	Bacteria; Firmicutes; Clostridia; Clostridiales; Lachnospiraceae; [Ruminococcus] gauvreauii group	genus (RDP, Silva 123, Silva 123 extra)	order (Clostridiales)	Stomatobaculum longum
327162	12481	0.273871	78.2164	Bacteria;Firmicutes;Clostridia;Clostridiales;unclassified_Clostridiales;unclassified_Clostridiales	Bacteria; Firmicutes; Clostridia; Clostridiales; Eubacteriaceae; Alkalibaculum	Bacteria; Firmicutes; Clostridia; Clostridiales; Eubacteriaceae; Alkalibaculum	k__Bacteria; p__Firmicutes; c__Clostridia; o__Clostridiales; f__; g__; s__	Bacteria; Firmicutes; Clostridia; Clostridiales; Christensenellaceae; uncultured	Bacteria; Firmicutes; Clostridia; Clostridiales; Christensenellaceae; Christensenellaceae R-7 group	genus (RDP, Silva 123, Silva 123 extra)	order (Clostridiales)	[Clostridium] straminisolvens
330704	7579	0.166306	67.9825	Bacteria;Firmicutes;Clostridia;Clostridiales;unclassified_Clostridiales;unclassified_Clostridiales	Bacteria; Firmicutes; Clostridia; Clostridiales; Eubacteriaceae; Alkalibaculum	Bacteria; Firmicutes; Clostridia; Clostridiales; Eubacteriaceae; Alkalibaculum	k__Bacteria; p__Firmicutes; c__Clostridia; o__Clostridiales; f__; g__; s__	Bacteria; Firmicutes; Clostridia; Clostridiales; Christensenellaceae; uncultured	Bacteria; Firmicutes; Clostridia; Clostridiales; Christensenellaceae; Christensenellaceae R-7 group	genus (RDP, Silva 123, Silva 123 extra)	order (Clostridiales)	[Clostridium] straminisolvens
344518	5724	0.125602	37.1345	Bacteria;Bacteroidetes;Bacteroidia;Bacteroidales;Prevotellaceae;Prevotella	Bacteria; Bacteroidetes; Bacteroidia; Bacteroidales; Prevotellaceae; Prevotella	Bacteria; Bacteroidetes; Bacteroidia; Bacteroidales; Prevotellaceae; Prevotella	k__Bacteria; p__Bacteroidetes; c__Bacteroidia; o__Bacteroidales; f__Prevotellaceae; g__Prevotella; s__	Bacteria; Bacteroidetes; Bacteroidia; Bacteroidales; Prevotellaceae; Prevotella	Bacteria; Bacteroidetes; Bacteroidia; Bacteroidales; Prevotellaceae; Prevotella 1	genus (all)	family (Prevotellaceae)	Prevotella brevis
359129	5635	0.123649	34.9415	Bacteria;Bacteroidetes;Bacteroidia;Bacteroidales;Prevotellaceae;Prevotella	Bacteria; Bacteroidetes; Bacteroidia; Bacteroidales; Prevotellaceae; Prevotella	Bacteria; Bacteroidetes; Bacteroidia; Bacteroidales; Prevotellaceae; Prevotella	k__Bacteria; p__Bacteroidetes; c__Bacteroidia; o__Bacteroidales; f__Prevotellaceae; g__Prevotella; s__	Bacteria; Bacteroidetes; Bacteroidia; Bacteroidales; Prevotellaceae; Prevotella	Bacteria; Bacteroidetes; Bacteroidia; Bacteroidales; Prevotellaceae; Prevotella 1	genus (all)	family (Prevotellaceae)	Prevotella amni
362266	7511	0.164814	68.2749	Bacteria;Bacteroidetes;Bacteroidia;Bacteroidales;Prevotellaceae;unclassified_"Prevotellaceae"	Bacteria; Bacteroidetes; Bacteroidia; Bacteroidales; Prevotellaceae; Prevotella	Bacteria; Bacteroidetes; Bacteroidia; Bacteroidales; Prevotellaceae; Prevotella	k__Bacteria; p__Bacteroidetes; c__Bacteroidia; o__Bacteroidales; f__Prevotellaceae; g__Prevotella; s__	Bacteria; Bacteroidetes; Bacteroidia; Bacteroidales; Prevotellaceae; Prevotella	Bacteria; Bacteroidetes; Bacteroidia; Bacteroidales; Prevotellaceae; Prevotella 1	genus (all)	family (Prevotellaceae)	Prevotella maculosa
365725	10926	0.23975	17.5439	Bacteria;Proteobacteria;Gammaproteobacteria;Aeromonadales;Succinivibrionaceae;Succinivibrio	Bacteria; Proteobacteria; Gammaproteobacteria; Aeromonadales; Succinivibrionaceae; Succinivibrio	Bacteria; Proteobacteria; Gammaproteobacteria; Aeromonadales; Succinivibrionaceae; Succinivibrio	k__Bacteria; p__Proteobacteria; c__Gammaproteobacteria; o__Aeromonadales; f__Succinivibrionaceae; g__; s__	Bacteria; Proteobacteria; Gammaproteobacteria; Aeromonadales; Succinivibrionaceae; Succinivibrio	Bacteria; Proteobacteria; Gammaproteobacteria; Aeromonadales; Succinivibrionaceae; Succinivibrio	genus (RDP, Silva 119, Silva 123, Silva 123 extra)	family (Succinivibrionaceae)	Succinivibrio dextrinosolvens
369625	8504	0.186604	11.2573	Bacteria;Bacteroidetes;Bacteroidia;Bacteroidales;Prevotellaceae;unclassified_"Prevotellaceae"	Bacteria; Bacteroidetes; Bacteroidia; Bacteroidales; Prevotellaceae; Prevotella	Bacteria; Bacteroidetes; Bacteroidia; Bacteroidales; Prevotellaceae; Prevotella	k__Bacteria; p__Bacteroidetes; c__Bacteroidia; o__Bacteroidales; f__Prevotellaceae; g__Prevotella; s__	Bacteria; Bacteroidetes; Bacteroidia; Bacteroidales; Prevotellaceae; Prevotella	Bacteria; Bacteroidetes; Bacteroidia; Bacteroidales; Prevotellaceae; Prevotella 1	genus (all)	family (Prevotellaceae)	Prevotella bryantii
401207	5659	0.124176	77.0468	Bacteria;Firmicutes;Clostridia;Clostridiales;Ruminococcaceae;unclassified_Ruminococcaceae	Bacteria; Firmicutes; Clostridia; Clostridiales; Ruminococcaceae; Papillibacter	Bacteria; Firmicutes; Clostridia; Clostridiales; Ruminococcaceae; Papillibacter	k__Bacteria; p__Firmicutes; c__Clostridia; o__Clostridiales; f__Ruminococcaceae; g__; s__	Bacteria; Firmicutes; Clostridia; Clostridiales; Ruminococcaceae; uncultured	Bacteria; Firmicutes; Clostridia; Clostridiales; Ruminococcaceae; Ruminococcaceae NK4A214 group	genus (RDP, Silva 123, Silva 123 extra)	family (Ruminococcaceae)	Oscillibacter valericigenes
404437	1968	0.0431839	57.8947	Bacteria;Firmicutes;Clostridia;Clostridiales;Clostridiales_Incertae Sedis XIII;Mogibacterium	Bacteria; Firmicutes; Clostridia; Clostridiales; Clostridiales_Incertae_Sedis_XIII; Mogibacterium	Bacteria; Firmicutes; Clostridia; Clostridiales; Clostridiales_Incertae_Sedis_XIII; Mogibacterium	k__Bacteria; p__Firmicutes; c__Clostridia; o__Clostridiales; f__[Mogibacteriaceae]; g__Mogibacterium; s__	Bacteria; Firmicutes; Clostridia; Clostridiales; Family XIII; Mogibacterium	Bacteria; Firmicutes; Clostridia; Clostridiales; Family XIII; Mogibacterium	genus (all)	genus (Mogibacterium)	Mogibacterium neglectum
410550	6108	0.134028	65.3509	Bacteria;unclassified_Bacteria;unclassified_Bacteria;unclassified_Bacteria;unclassified_Bacteria;unclassified_Bacteria	Bacteria; Lentisphaerae; Lentisphaeria; Victivallales; Victivallaceae; Victivallis	Bacteria; Lentisphaerae; Lentisphaeria; Victivallales; Victivallaceae; Victivallis	k__Bacteria; p__Lentisphaerae; c__[Lentisphaeria]; o__Victivallales; f__Victivallaceae; g__; s__	Bacteria; Lentisphaerae; Lentisphaeria; Victivallales; Victivallaceae; Victivallis	Bacteria; Lentisphaerae; Lentisphaeria; Victivallales; Victivallaceae; Victivallis	genus (RDP, Silva 119, Silva 123, Silva 123 extra)	family (Victivallaceae)	Victivallis vadensis
426876	5352	0.117439	61.5497	Bacteria;Firmicutes;Clostridia;Clostridiales;unclassified_Clostridiales;unclassified_Clostridiales	Bacteria; Firmicutes; Clostridia; Clostridiales; Ruminococcaceae; Saccharofermentans	Bacteria; Firmicutes; Clostridia; Clostridiales; Ruminococcaceae; Saccharofermentans	k__Bacteria; p__Firmicutes; c__Clostridia; o__Clostridiales; f__; g__; s__	Bacteria; Firmicutes; Clostridia; Clostridiales; Christensenellaceae; uncultured	Bacteria; Firmicutes; Clostridia; Clostridiales; Christensenellaceae; Christensenellaceae R-7 group	genus (RDP, Silva 123, Silva 123 extra)	order (Clostridiales)	Catabacter hongkongensis
439520	8407	0.184475	3.65497	Bacteria;Firmicutes;Bacilli;Lactobacillales;Carnobacteriaceae;Carnobacterium	Bacteria; Firmicutes; Bacilli; Lactobacillales; Carnobacteriaceae; Carnobacterium	Bacteria; Firmicutes; Bacilli; Lactobacillales; Carnobacteriaceae; Carnobacterium	k__Bacteria; p__Firmicutes; c__Bacilli; o__Lactobacillales; f__Carnobacteriaceae; g__Carnobacterium; s__viridans	Bacteria; Firmicutes; Bacilli; Lactobacillales; Carnobacteriaceae; Carnobacterium	Bacteria; Firmicutes; Bacilli; Lactobacillales; Carnobacteriaceae; Carnobacterium	genus (all)	genus (Carnobacterium)	Carnobacterium inhibens
451201	8636	0.1895	4.67836	Bacteria;Firmicutes;Bacilli;Lactobacillales;Leuconostocaceae;Weissella	Bacteria; Firmicutes; Bacilli; Lactobacillales; Leuconostocaceae; Weissella	Bacteria; Firmicutes; Bacilli; Lactobacillales; Leuconostocaceae; Weissella	k__Bacteria; p__Firmicutes; c__Bacilli; o__Lactobacillales; f__Leuconostocaceae; g__Weissella; s__paramesenteroides	Bacteria; Firmicutes; Bacilli; Lactobacillales; Leuconostocaceae; Weissella	Bacteria; Firmicutes; Bacilli; Lactobacillales; Leuconostocaceae; Weissella	genus (all)	genus (Weissella)	Weissella paramesenteroides
454127	11386	0.249844	68.1287	Bacteria;Bacteroidetes;Bacteroidia;Bacteroidales;Prevotellaceae;Prevotella	Bacteria; Bacteroidetes; Bacteroidia; Bacteroidales; Prevotellaceae; Prevotella	Bacteria; Bacteroidetes; Bacteroidia; Bacteroidales; Prevotellaceae; Prevotella	k__Bacteria; p__Bacteroidetes; c__Bacteroidia; o__Bacteroidales; f__Prevotellaceae; g__Prevotella; s__	Bacteria; Bacteroidetes; Bacteroidia; Bacteroidales; Prevotellaceae; Prevotella	Bacteria; Bacteroidetes; Bacteroidia; Bacteroidales; Prevotellaceae; Prevotella 1	genus (all)	family (Prevotellaceae)	Prevotella ruminicola
480108	21662	0.47533	72.9532	Bacteria;Fibrobacteres;Fibrobacteria;Fibrobacterales;Fibrobacteraceae;Fibrobacter	Bacteria; Fibrobacteres; Fibrobacteria; Fibrobacterales; Fibrobacteraceae; Fibrobacter	Bacteria; Fibrobacteres; Fibrobacteria; Fibrobacterales; Fibrobacteraceae; Fibrobacter	k__Bacteria; p__Fibrobacteres; c__Fibrobacteria; o__Fibrobacterales; f__Fibrobacteraceae; g__Fibrobacter; s__succinogenes	Bacteria; Fibrobacteres; Fibrobacteria; Fibrobacterales; Fibrobacteraceae; Fibrobacter	Bacteria; Fibrobacteres; Fibrobacteria; Fibrobacterales; Fibrobacteraceae; Fibrobacter	genus (all)	genus (Fibrobacter)	Fibrobacter succinogenes
492371	4673	0.10254	61.6959	Bacteria;Bacteroidetes;Bacteroidia;Bacteroidales;Prevotellaceae;unclassified_"Prevotellaceae"	Bacteria; Bacteroidetes; Bacteroidia; Bacteroidales; Prevotellaceae; Hallella	Bacteria; Bacteroidetes; Bacteroidia; Bacteroidales; Prevotellaceae; Prevotella	k__Bacteria; p__Bacteroidetes; c__Bacteroidia; o__Bacteroidales; f__Prevotellaceae; g__Prevotella; s__	Bacteria; Bacteroidetes; Bacteroidia; Bacteroidales; Prevotellaceae; Prevotella	Bacteria; Bacteroidetes; Bacteroidia; Bacteroidales; Prevotellaceae; Prevotella 1	genus (all)	family (Prevotellaceae)	Prevotella loescheii
493059	15880	0.348456	80.848	Bacteria;Firmicutes;Clostridia;Clostridiales;Lachnospiraceae;unclassified_Lachnospiraceae	Bacteria; Firmicutes; Clostridia; Clostridiales; Lachnospiraceae; Clostridium_XlVa	Bacteria; Firmicutes; Clostridia; Clostridiales; Lachnospiraceae; Clostridium_XlVa	k__Bacteria; p__Firmicutes; c__Clostridia; o__Clostridiales; f__Lachnospiraceae; g__Butyrivibrio; s__	Bacteria; Firmicutes; Clostridia; Clostridiales; Lachnospiraceae; Butyrivibrio	Bacteria; Firmicutes; Clostridia; Clostridiales; Lachnospiraceae; Lachnospiraceae NK3A20 group	genus (all)	family (Lachnospiraceae)	[Clostridium] clostridioforme
494938	3845	0.084371	68.5673	Bacteria;Firmicutes;Clostridia;Clostridiales;Ruminococcaceae;unclassified_Ruminococcaceae	Bacteria; Firmicutes; Clostridia; Clostridiales; Ruminococcaceae; Clostridium_III	Bacteria; Firmicutes; Clostridia; Clostridiales; Ruminococcaceae; Intestinimonas	k__Bacteria; p__Firmicutes; c__Clostridia; o__Clostridiales; f__; g__; s__	Bacteria; Firmicutes; Clostridia; Clostridiales; Ruminococcaceae; Saccharofermentans	Bacteria; Firmicutes; Clostridia; Clostridiales; Ruminococcaceae; Saccharofermentans	genus (RDP, Silva 119, Silva 123, Silva 123 extra)	family (Ruminococcaceae)	Saccharofermentans acetigenes
495334	5935	0.130232	63.0117	Bacteria;Firmicutes;Clostridia;Clostridiales;Lachnospiraceae;unclassified_Lachnospiraceae	Bacteria; Firmicutes; Clostridia; Clostridiales; Lachnospiraceae; Clostridium_XlVa	Bacteria; Firmicutes; Clostridia; Clostridiales; Lachnospiraceae; Clostridium_XlVa	k__Bacteria; p__Firmicutes; c__Clostridia; o__Clostridiales; f__Lachnospiraceae; g__Butyrivibrio; s__	Bacteria; Firmicutes; Clostridia; Clostridiales; Lachnospiraceae; Butyrivibrio	Bacteria; Firmicutes; Clostridia; Clostridiales; Lachnospiraceae; Lachnospiraceae NK3A20 group	genus (all)	family (Lachnospiraceae)	[Clostridium] clostridioforme
550791	7496	0.164485	57.8947	Bacteria;Firmicutes;Clostridia;Clostridiales;Lachnospiraceae;unclassified_Lachnospiraceae	Bacteria; Firmicutes; Clostridia; Clostridiales; Lachnospiraceae; Butyrivibrio	Bacteria; Firmicutes; Clostridia; Clostridiales; Lachnospiraceae; Butyrivibrio	k__Bacteria; p__Firmicutes; c__Clostridia; o__Clostridiales; f__Lachnospiraceae; g__Butyrivibrio; s__	Bacteria; Firmicutes; Clostridia; Clostridiales; Lachnospiraceae; Butyrivibrio	Bacteria; Firmicutes; Clostridia; Clostridiales; Lachnospiraceae; Lachnospiraceae NK3A20 group	genus (all)	family (Lachnospiraceae)	[Clostridium] clostridioforme
571472	8542	0.187438	6.87135	Bacteria;Proteobacteria;Gammaproteobacteria;Aeromonadales;Succinivibrionaceae;Succinivibrio	Bacteria; Proteobacteria; Gammaproteobacteria; Aeromonadales; Succinivibrionaceae; Succinivibrio	Bacteria; Proteobacteria; Gammaproteobacteria; Aeromonadales; Succinivibrionaceae; Succinivibrio	k__Bacteria; p__Proteobacteria; c__Gammaproteobacteria; o__Aeromonadales; f__Succinivibrionaceae; g__Succinivibrio; s__	Bacteria; Proteobacteria; Gammaproteobacteria; Aeromonadales; Succinivibrionaceae; Succinivibrio	Bacteria; Proteobacteria; Gammaproteobacteria; Aeromonadales; Succinivibrionaceae; Succinivibrio	genus (all)	genus (Succinivibrio)	Succinivibrio dextrinosolvens
576819	5844	0.128235	38.7427	Bacteria;Bacteroidetes;Bacteroidia;Bacteroidales;Prevotellaceae;Prevotella	Bacteria; Bacteroidetes; Bacteroidia; Bacteroidales; Prevotellaceae; Prevotella	Bacteria; Bacteroidetes; Bacteroidia; Bacteroidales; Prevotellaceae; Prevotella	k__Bacteria; p__Bacteroidetes; c__Bacteroidia; o__Bacteroidales; f__Prevotellaceae; g__Prevotella; s__	Bacteria; Bacteroidetes; Bacteroidia; Bacteroidales; Prevotellaceae; Prevotella	Bacteria; Bacteroidetes; Bacteroidia; Bacteroidales; Prevotellaceae; Prevotella 1	genus (all)	family (Prevotellaceae)	Prevotella ruminicola
577394	2481	0.0544407	58.1871	Bacteria;Firmicutes;Clostridia;Clostridiales;Ruminococcaceae;unclassified_Ruminococcaceae	Bacteria; Firmicutes; Clostridia; Clostridiales; Ruminococcaceae; Papillibacter	Bacteria; Firmicutes; Clostridia; Clostridiales; Ruminococcaceae; Papillibacter	k__Bacteria; p__Firmicutes; c__Clostridia; o__Clostridiales; f__Ruminococcaceae; g__; s__	Bacteria; Firmicutes; Clostridia; Clostridiales; Ruminococcaceae; uncultured	Bacteria; Firmicutes; Clostridia; Clostridiales; Ruminococcaceae; Ruminococcaceae NK4A214 group	genus (RDP, Silva 123, Silva 123 extra)	family (Ruminococcaceae)	Oscillibacter valericigenes
580981	6368	0.139733	37.5731	Bacteria;Firmicutes;Clostridia;Clostridiales;Ruminococcaceae;unclassified_Ruminococcaceae	Bacteria; Firmicutes; Clostridia; Clostridiales; Ruminococcaceae; Ruminococcus	Bacteria; Firmicutes; Clostridia; Clostridiales; Ruminococcaceae; Ruminococcus	k__Bacteria; p__Firmicutes; c__Clostridia; o__Clostridiales; f__Ruminococcaceae; g__Ruminococcus; s__	Bacteria; Firmicutes; Clostridia; Clostridiales; Ruminococcaceae; Ruminococcus	Bacteria; Firmicutes; Clostridia; Clostridiales; Ruminococcaceae; Ruminococcus 2	genus (all)	genus (Ruminococcus)	Ruminococcus bromii
605934	3090	0.067804	58.4795	Bacteria;Firmicutes;Clostridia;Clostridiales;Lachnospiraceae;unclassified_Lachnospiraceae	Bacteria; Firmicutes; Clostridia; Clostridiales; Lachnospiraceae; Clostridium_XlVa	Bacteria; Firmicutes; Clostridia; Clostridiales; Lachnospiraceae; Coprococcus	k__Bacteria; p__Firmicutes; c__Clostridia; o__Clostridiales; f__Lachnospiraceae; g__; s__	Bacteria; Firmicutes; Clostridia; Clostridiales; Lachnospiraceae; uncultured	Bacteria; Firmicutes; Clostridia; Clostridiales; Lachnospiraceae; Lachnospiraceae AC2044 group	genus (RDP, Silva 123, Silva 123 extra)	family (Lachnospiraceae)	Coprococcus eutactus
658563	6116	0.134204	59.0643	Bacteria;Bacteroidetes;Bacteroidia;Bacteroidales;Porphyromonadaceae;unclassified_"Porphyromonadaceae"	Bacteria; Bacteroidetes; Bacteroidia; Bacteroidales; Bacteroidaceae; Bacteroides	Bacteria; Bacteroidetes; Bacteroidia; Bacteroidales; Bacteroidaceae; Bacteroides	k__Bacteria; p__Bacteroidetes; c__Bacteroidia; o__Bacteroidales; f__RF16; g__; s__	Bacteria; Bacteroidetes; Bacteroidia; Bacteroidales; RF16	Bacteria; Bacteroidetes; Bacteroidia; Bacteroidales; Bacteroidales RF16 group	genus (RDP)	order (Bacteroidales)	Bacteroides coprophilus
662614	3553	0.0779637	66.3743	Bacteria;Firmicutes;Clostridia;Clostridiales;Lachnospiraceae;unclassified_Lachnospiraceae	Bacteria; Firmicutes; Clostridia; Clostridiales; Lachnospiraceae; Syntrophococcus	Bacteria; Firmicutes; Clostridia; Clostridiales; Lachnospiraceae; Syntrophococcus	k__Bacteria; p__Firmicutes; c__Clostridia; o__Clostridiales; f__; g__; s__	Bacteria; Firmicutes; Clostridia; Clostridiales; Lachnospiraceae; probable genus 10	Bacteria; Firmicutes; Clostridia; Clostridiales; Lachnospiraceae; probable genus 10	genus (RDP, Silva 119, Silva 123, Silva 123 extra)	order (Clostridiales)	Stomatobaculum longum
664059	11073	0.242975	14.6199	Bacteria;Bacteroidetes;Bacteroidia;Bacteroidales;Prevotellaceae;Prevotella	Bacteria; Bacteroidetes; Bacteroidia; Bacteroidales; Prevotellaceae; Prevotella	Bacteria; Bacteroidetes; Bacteroidia; Bacteroidales; Prevotellaceae; Prevotella	k__Bacteria; p__Bacteroidetes; c__Bacteroidia; o__Bacteroidales; f__Prevotellaceae; g__Prevotella; s__	Bacteria; Bacteroidetes; Bacteroidia; Bacteroidales; Prevotellaceae; Prevotella	Bacteria; Bacteroidetes; Bacteroidia; Bacteroidales; Prevotellaceae; Prevotella 7	genus (all)	family (Prevotellaceae)	Prevotella histicola
694360	2746	0.0602556	64.9123	Bacteria;unclassified_Bacteria;unclassified_Bacteria;unclassified_Bacteria;unclassified_Bacteria;unclassified_Bacteria	Bacteria; Firmicutes; Clostridia; Clostridiales; Clostridiaceae_1; Clostridium_sensu_stricto	Bacteria; Firmicutes; Erysipelotrichia; Erysipelotrichales; Erysipelotrichaceae	k__Bacteria; p__Firmicutes; c__Erysipelotrichi; o__Erysipelotrichales; f__Erysipelotrichaceae; g__RFN20; s__	Bacteria; Firmicutes; Erysipelotrichia; Erysipelotrichales; Erysipelotrichaceae; uncultured	Bacteria; Firmicutes; Erysipelotrichia; Erysipelotrichales; Erysipelotrichaceae; Erysipelotrichaceae UCG-004	genus (all)	phylum (Firmicutes)	Acholeplasma parvum
698124	12059	0.264611	64.0351	Bacteria;Firmicutes;Clostridia;Clostridiales;Lachnospiraceae;unclassified_Lachnospiraceae	Bacteria; Firmicutes; Clostridia; Clostridiales; Lachnospiraceae; Hespellia	Bacteria; Firmicutes; Clostridia; Clostridiales; Lachnospiraceae; Mobilitalea	k__Bacteria; p__Firmicutes; c__Clostridia; o__Clostridiales; f__Lachnospiraceae; g__; s__	Bacteria; Firmicutes; Clostridia; Clostridiales; Lachnospiraceae; Acetitomaculum	Bacteria; Firmicutes; Clostridia; Clostridiales; Lachnospiraceae; Acetitomaculum	genus (RDP, Silva 119, Silva 123, Silva 123 extra)	family (Lachnospiraceae)	[Clostridium] jejuense
703605	5343	0.117242	63.0117	Bacteria;Bacteroidetes;unclassified_"Bacteroidetes";unclassified_"Bacteroidetes";unclassified_"Bacteroidetes";unclassified_"Bacteroidetes"	Bacteria; Bacteroidetes; Bacteroidia; Bacteroidales; Prevotellaceae; Prevotella	Bacteria; Bacteroidetes; Bacteroidia; Bacteroidales; Prevotellaceae; Prevotella	k__Bacteria; p__Bacteroidetes; c__Bacteroidia; o__Bacteroidales; f__; g__; s__	Bacteria; Bacteroidetes; Bacteroidia; Bacteroidales; Rikenellaceae; RC9 gut group	Bacteria; Bacteroidetes; Bacteroidia; Bacteroidales; Rikenellaceae; Rikenellaceae RC9 gut group	genus (RDP, Silva 119, Silva 123)	order (Bacteroidales)	Odoribacter splanchnicus
722152	25432	0.558056	17.9825	Bacteria;Proteobacteria;Gammaproteobacteria;unclassified_Gammaproteobacteria;unclassified_Gammaproteobacteria;unclassified_Gammaproteobacteria	Bacteria; Proteobacteria; Gammaproteobacteria; Aeromonadales; Aeromonadaceae; Aeromonas	Bacteria; Proteobacteria; Gammaproteobacteria; Aeromonadales; Aeromonadaceae; Aeromonas	k__Bacteria; p__Proteobacteria; c__Gammaproteobacteria; o__Aeromonadales; f__Succinivibrionaceae; g__; s__	Bacteria; Proteobacteria; Gammaproteobacteria; Aeromonadales; Succinivibrionaceae; uncultured	Bacteria; Proteobacteria; Gammaproteobacteria; Aeromonadales; Succinivibrionaceae; Succinivibrionaceae UCG-001	genus (RDP, Silva 123, Silva 123 extra)	order (Aeromonadales)	Succinivibrio dextrinosolvens
732718	6600	0.144824	15.7895	Bacteria;Firmicutes;Clostridia;Clostridiales;Lachnospiraceae;unclassified_Lachnospiraceae	Bacteria; Firmicutes; Clostridia; Clostridiales; Lachnospiraceae; Marvinbryantia	Bacteria; Firmicutes; Clostridia; Clostridiales; Lachnospiraceae; Blautia	k__Bacteria; p__Firmicutes; c__Clostridia; o__Clostridiales; f__Ruminococcaceae; g__; s__	Bacteria; Firmicutes; Clostridia; Clostridiales; Lachnospiraceae; Blautia	Bacteria; Firmicutes; Clostridia; Clostridiales; Lachnospiraceae; Blautia	genus (RDP, Silva 119, Silva 123, Silva 123 extra)	order (Clostridiales)	Blautia wexlerae
751129	3504	0.0768884	67.3977	Bacteria;Firmicutes;Clostridia;Clostridiales;Ruminococcaceae;unclassified_Ruminococcaceae	Bacteria; Firmicutes; Clostridia; Clostridiales; Ruminococcaceae; Saccharofermentans	Bacteria; Firmicutes; Clostridia; Clostridiales; Ruminococcaceae; Saccharofermentans	k__Bacteria; p__Firmicutes; c__Clostridia; o__Clostridiales; f__Ruminococcaceae; g__; s__	Bacteria; Firmicutes; Clostridia; Clostridiales; Ruminococcaceae; uncultured	Bacteria; Firmicutes; Clostridia; Clostridiales; Ruminococcaceae; Ruminococcaceae NK4A214 group	genus (RDP, Silva 123, Silva 123 extra)	family (Ruminococcaceae)	Oscillibacter valericigenes
758091	5900	0.129464	27.0468	Bacteria;Bacteroidetes;Bacteroidia;Bacteroidales;Prevotellaceae;unclassified_"Prevotellaceae"	Bacteria; Bacteroidetes; Bacteroidia; Bacteroidales; Prevotellaceae; Prevotella	Bacteria; Bacteroidetes; Bacteroidia; Bacteroidales; Prevotellaceae; Prevotella	k__Bacteria; p__Bacteroidetes; c__Bacteroidia; o__Bacteroidales; f__Prevotellaceae; g__Prevotella; s__	Bacteria; Bacteroidetes; Bacteroidia; Bacteroidales; Prevotellaceae; uncultured	Bacteria; Bacteroidetes; Bacteroidia; Bacteroidales; Prevotellaceae; Prevotellaceae UCG-001	genus (Greengenes, RDP, Silva 123, Silva 123 extra)	family (Prevotellaceae)	Prevotella amni
762328	7358	0.161457	65.6433	Bacteria;Bacteroidetes;Bacteroidia;Bacteroidales;Prevotellaceae;Prevotella	Bacteria; Bacteroidetes; Bacteroidia; Bacteroidales; Prevotellaceae; Prevotella	Bacteria; Bacteroidetes; Bacteroidia; Bacteroidales; Prevotellaceae; Prevotella	k__Bacteria; p__Bacteroidetes; c__Bacteroidia; o__Bacteroidales; f__Prevotellaceae; g__Prevotella; s__	Bacteria; Bacteroidetes; Bacteroidia; Bacteroidales; Prevotellaceae; Prevotella	Bacteria; Bacteroidetes; Bacteroidia; Bacteroidales; Prevotellaceae; Prevotella 1	genus (all)	family (Prevotellaceae)	Prevotella ruminicola
